# Supplementary material
Source: ML conference proceedings conference paper supplement (https://openreview.net/forum?id=CUmbgiiNff)
Supplement: supplementary_material [file attachment]

## A ADDITIONAL ABLATION STUDIES

### A.1 COMPARISON WITH LIGHTWEIGHT TUNING METHODS.

Table A.1: Comparison of lightweight tuning methods on RSTPReid(Zhu et al., 2021) benchmark.

| Method                           | Tuning Layers       | R@1   | R@5   | R@10  | mAP   |
|----------------------------------|---------------------|-------|-------|-------|-------|
| Baseline                         | –                   | 60.64 | 77.50 | 83.26 | 35.54 |
| CoOp*(Zhou et al., 2022)         | Prompt Embedding    | 58.60 | 79.65 | 87.50 | 43.65 |
| Prefix-Tuning*(Li & Liang, 2021) | Prefix Embedding    | 26.25 | 51.45 | 63.75 | 23.14 |
| LoRA*(Hu et al., 2022)           | LoRA Matrix         | 49.80 | 73.80 | 82.70 | 38.61 |
| Ours                             | Normalization Layer | 61.85 | 81.40 | 88.40 | 46.37 |

We compare our method with lightweight tuning methods in Table A.1. Baseline is LuPersonHAM (Jiang et al., 2025) and \* means that we try different hyperparameters *i.e.* learning rate, number of virtual tokens, rank of LoRA(Hu et al., 2022) etc., for lightweight tuning methods and selected the best result. CoOp(Zhou et al., 2022), which is a prompt learning method and belong to few-shot learning, fails with adaptation objective of entropy minimization. It can be interpreted that additional prompt token embeddings need labeled data to mimic natural language feature in the token embedding space, instead of adjusting the cross-modal feature distribution in latent space. Additionally, Parameter Efficient Fine-Tuning (PEFT)(Han et al., 2024) provides a practical solution by efficiently adjusting the large models over the various downstream tasks. We also evaluated two representative PEFT methods, *i.e.*, Prefix-Tuning (Li & Liang, 2021) and LoRA (Hu et al., 2022), for test-time adaptation on the RSTPReid benchmark, however, these approaches proved ineffective in our experiments. Although the trainable parameters in PEFT are lightweight, Entropy Minimization fails to provide sufficient supervision for learning discriminative representations.

### A.2 MORE ABLATION STUDY ON RSTPREID.

Table A.2: **More Ablation of Bidirectional Top- $K$  Retrieval Consistent Sample Selection  $K$  on RSTPReid.**  $K$  denotes the mutual top range of bidirectional retrieval. We obtain the best result at  $K = 3$ , but the number of ground-truth image in RSTPReid is 5, as it represent the borderline of true and false positives. We choose  $K = 5$  with gray line as default setting.

Table A.3

| $K$      | R@1          | R@5          | R@10         | mAP          |
|----------|--------------|--------------|--------------|--------------|
| 1        | 61.60        | 81.10        | <b>88.75</b> | 45.90        |
| 2        | 60.90        | 81.30        | <b>88.75</b> | 46.14        |
| 3        | <b>61.90</b> | 81.20        | 88.05        | <b>46.39</b> |
| 4        | 61.85        | 81.30        | 88.15        | 46.38        |
| 5        | 61.85        | <b>81.40</b> | 88.40        | 46.37        |
| 6        | 61.05        | 80.95        | 88.30        | 46.17        |
| 8        | 61.30        | 81.10        | 87.85        | 46.04        |
| 10       | 61.05        | 80.80        | 88.00        | 45.93        |
| $\infty$ | 61.55        | 80.75        | 88.20        | 45.96        |

**Effect of  $K$  Mutual Neighbours.** Despite the physical meaning of top- $K$ , we compare more  $K$  in Table A.3. To some extent, results indicate the generalization performance of different  $K$ .

054  
055  
056  
057  
058  
059  
060  
061  
062  
063  
064  
065  
066  
067  
068  
069  
070  
071  
072  
073  
074  
075  
076  
077  
078  
079  
080  
081  
082  
083  
084  
085  
086  
087  
088  
089  
090  
091  
092  
093  
094  
095  
096  
097  
098  
099  
100  
101  
102  
103  
104  
105  
106  
107

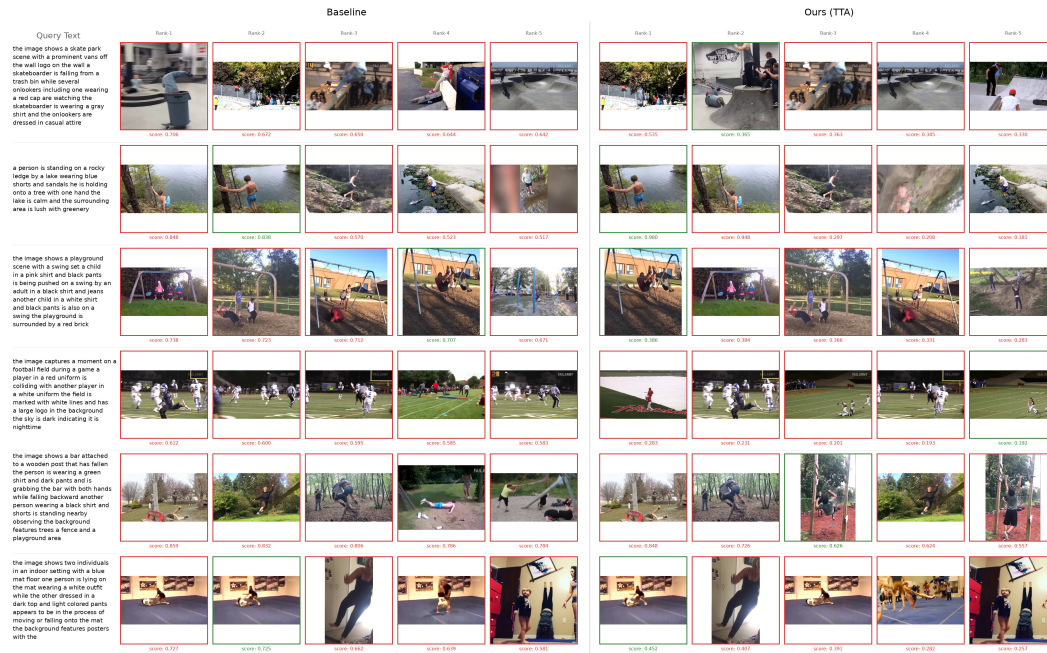

Figure B.1: **Top-5 Text-based Person Search Results on PAB.** The figure displays the Top-5 retrieval results for six representative text queries, with the confidence score for each rank provided below the corresponding image. The matched person images are annotated in green boxes, and the false ones are in red.

## B MORE QUALITATIVE RESULTS

### B.1 QUALITATIVE ANALYSIS OF PERSON SEARCH PERFORMANCE

To qualitatively validate the effectiveness of our Uncertainty-Aware Test-Time Adaptation (UATTA), we present a visual comparison of retrieval results between the Baseline and UATTA on the PAB dataset in Figure B.1. The visualization effectively showcases two key strengths of UATTA: First, in challenging cases (Rows 1, 4, 5) where the Baseline fails due to overly high confidence in false positives, UATTA successfully rectifies the score distribution by mitigating this over-confidence, leading to the correct identification of the ground-truth image. Second, for scenarios requiring fine-grained semantic distinction (Rows 2, 3, 6), UATTA leverages the bidirectional retrieval disagreement proxy to effectively disambiguate subtle differences between the text and image modalities. This mechanism allows UATTA to elevate the correct match from a low rank to Rank-1, significantly outperforming the Baseline. Overall, the qualitative results confirm that UATTA achieves a sharper, more robust, and accurate confidence distribution, validating its superiority in handling both retrieval ambiguity and fine-grained visual differences.

### B.2 VISUALIZATION OF FEATURE SPACE SHIFTS

In Figure B.2, T-SNE visualization provides an intuitive illustration of the impact of Test-Time Adaptation (TTA) on Feature Space. The visualization is focused on a representative subset of the Top-15 most frequent person identities to ensure clarity and showcase the adaptation effects vividly. We notice that the initial spread of original Query features (circles) demonstrates the significant domain gap and feature ambiguity present before adaptation, justifying the necessity of TTA. After TTA, regions circled by dotted ellipses indicate that query features, post-TTA (diamonds), are effectively adapted to align more closely with their respective gallery feature (squares) clusters. This convergence demonstrates the efficacy of TTA in reducing feature disparity and enhancing matching performance. While the majority of person identities show strong alignment, we observe that

108  
109  
110  
111  
112  
113  
114  
115  
116  
117  
118  
119  
120  
121  
122  
123  
124  
125  
126  
127  
128  
129  
130  
131  
132  
133  
134  
135  
136  
137  
138  
139  
140  
141  
142  
143  
144  
145  
146  
147  
148  
149  
150  
151  
152  
153  
154  
155  
156  
157  
158  
159  
160  
161

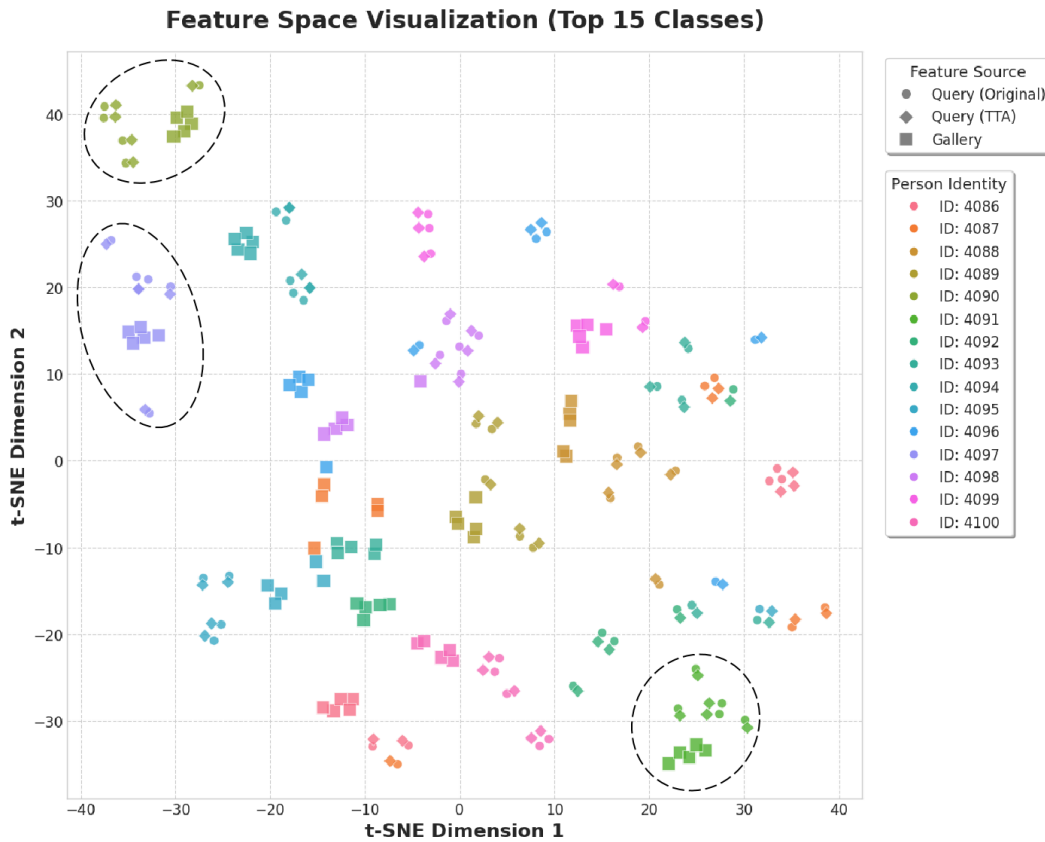

Figure B.2: **T-SNE Visualization of Feature Space Shifts on RSTPReid.** The three distinct point types represent: original query features (circles) before Test-Time Adaptation (TTA), query features after TTA (diamonds), and gallery features (squares). Different colors distinguish individual person identities.

some identities still exhibit residual ambiguity after TTA, suggesting potential avenues for future improvement in feature consolidation.

162  
163  
164  
165  
166  
167  
168  
169  
170  
171  
172  
173  
174  
175  
176  
177  
178  
179  
180  
181  
182  
183  
184  
185  
186  
187  
188  
189  
190  
191  
192  
193  
194  
195  
196  
197  
198  
199  
200  
201  
202  
203  
204  
205  
206  
207  
208  
209  
210  
211  
212  
213  
214  
215

---

## REFERENCES

- Zeyu Han, Chao Gao, Jinyang Liu, Jeff Zhang, and Sai Qian Zhang. Parameter-efficient fine-tuning for large models: A comprehensive survey. *arXiv preprint arXiv:2403.14608*, 2024.
- Edward J Hu, Yelong Shen, Phillip Wallis, Zeyuan Allen-Zhu, Yuanzhi Li, Shean Wang, Lu Wang, Weizhu Chen, et al. Lora: Low-rank adaptation of large language models. *ICLR*, 1(2):3, 2022.
- Jiayu Jiang, Changxing Ding, Wentao Tan, Junhong Wang, Jin Tao, and Xiangmin Xu. Modeling thousands of human annotators for generalizable text-to-image person re-identification. In *Proceedings of the Computer Vision and Pattern Recognition Conference*, pp. 9220–9230, 2025.
- Xiang Lisa Li and Percy Liang. Prefix-tuning: Optimizing continuous prompts for generation. *arXiv preprint arXiv:2101.00190*, 2021.
- Kaiyang Zhou, Jingkang Yang, Chen Change Loy, and Ziwei Liu. Learning to prompt for vision-language models. *International Journal of Computer Vision*, 130(9):2337–2348, 2022.
- Aichun Zhu, Zijie Wang, Yifeng Li, Xili Wan, Jing Jin, Tian Wang, Fangqiang Hu, and Gang Hua. Dssl: Deep surroundings-person separation learning for text-based person retrieval. In *Proceedings of the 29th ACM international conference on multimedia*, pp. 209–217, 2021.
